# Supplementary material for: Reactions of nitrogen oxides with heme models. Low temperature spectral characterization of the unstable nitrato-nitrosyl complex FeIII(TPP)(ONO2)(NO)Electronic supplementary information (ESI) available: IR and UV-Visible spectra of A. See http://www.rsc.org/suppdata/cc/b3/b302061d/
Source: Royal Society of Chemistry journal article supplement (doi:10.1039/b302061d), 2003-01-01

**Figure S1.** Low temperature (T = 80 K) IR spectra of Fe(TPP)(NO3) thin film after supplying in to cryostat at 80 K 10 Torr NO, warming to 160 K and re-cooling (solid line); the same after interaction of 15NO with Fe(TPP)(15NO3) (dashed line). Solid and dashed arrows indicate the axial ligands bands for natural and 15N derivatives respectively.


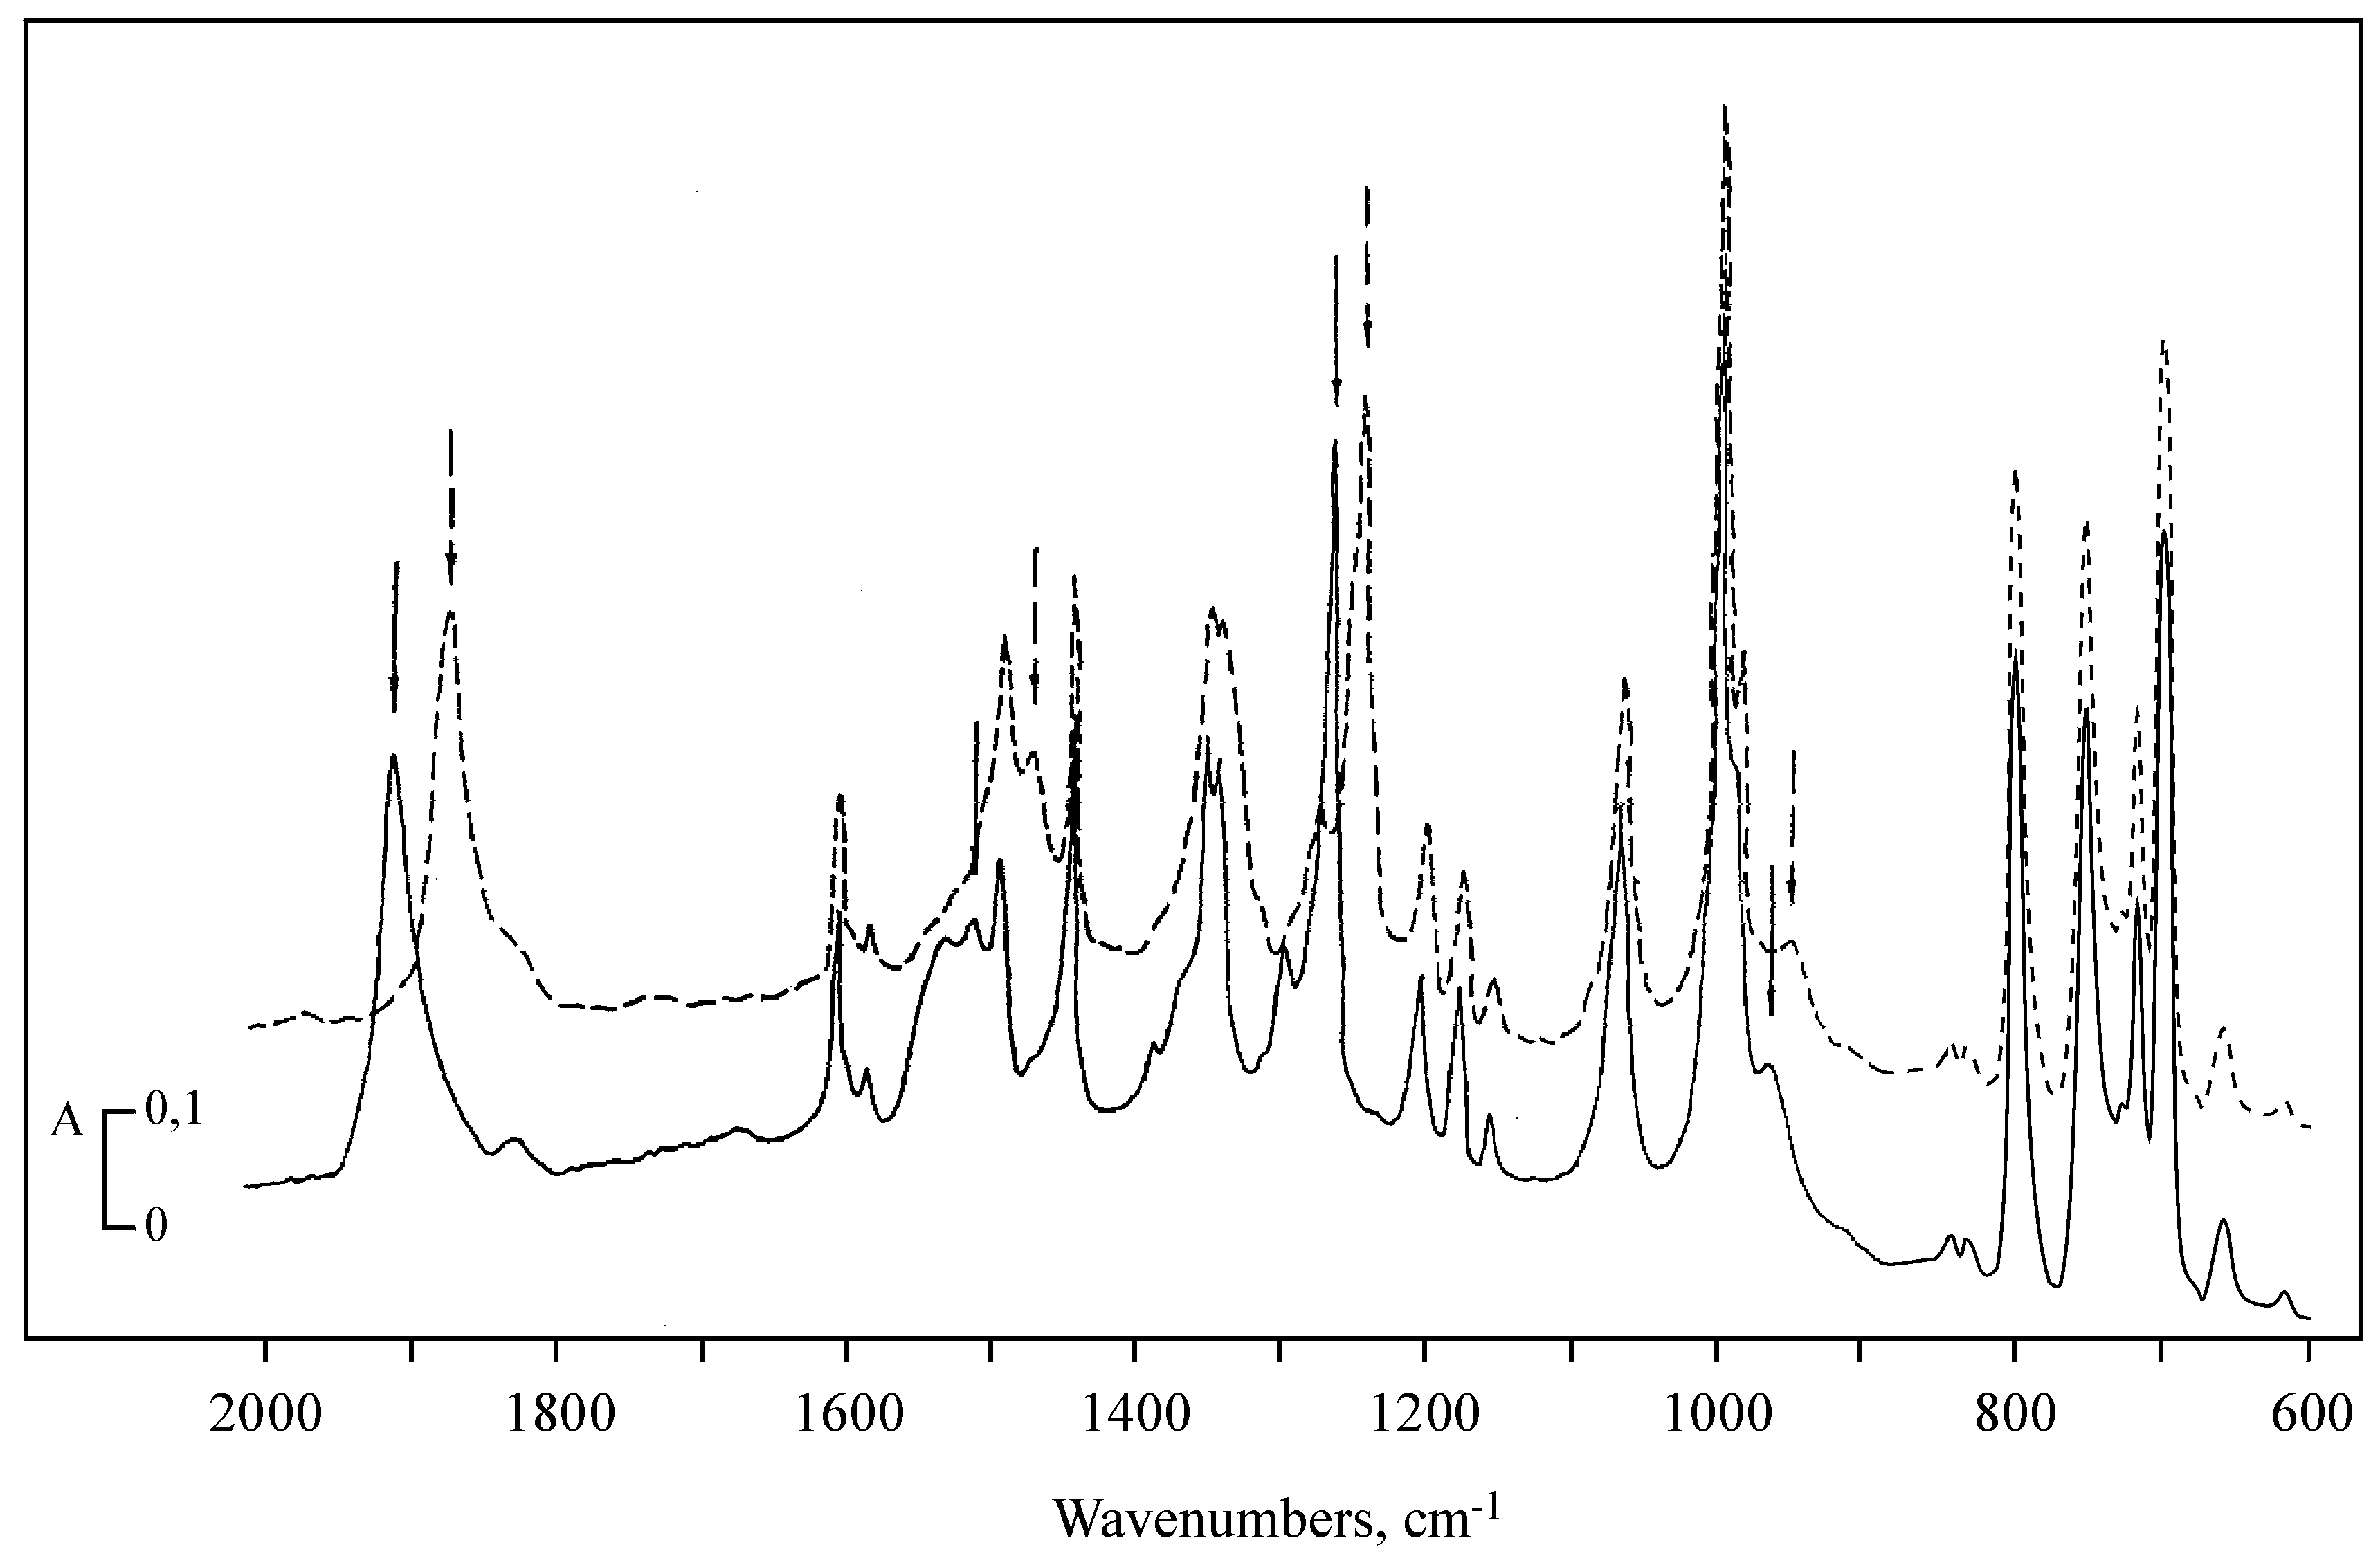

Supplement: figs1.doc [file figs1.doc]
