# Supplementary material for: Reactions of nitrogen oxides with heme models. Low temperature spectral characterization of the unstable nitrato-nitrosyl complex FeIII(TPP)(ONO2)(NO)Electronic supplementary information (ESI) available: IR and UV-Visible spectra of A. See http://www.rsc.org/suppdata/cc/b3/b302061d/
Source: Royal Society of Chemistry journal article supplement (doi:10.1039/b302061d), 2003-01-01
Supplement: figs2.doc [file figs2.doc]

**Figure S2.** Low temperature (T = 77 K) UV-visible spectra of sublimed layer containing Fe(TPP)(NO3) (dashed line) after supplying into cryostat 5 Torr NO at 77 K, warming to 160 K and re-cooling (solid line).

**
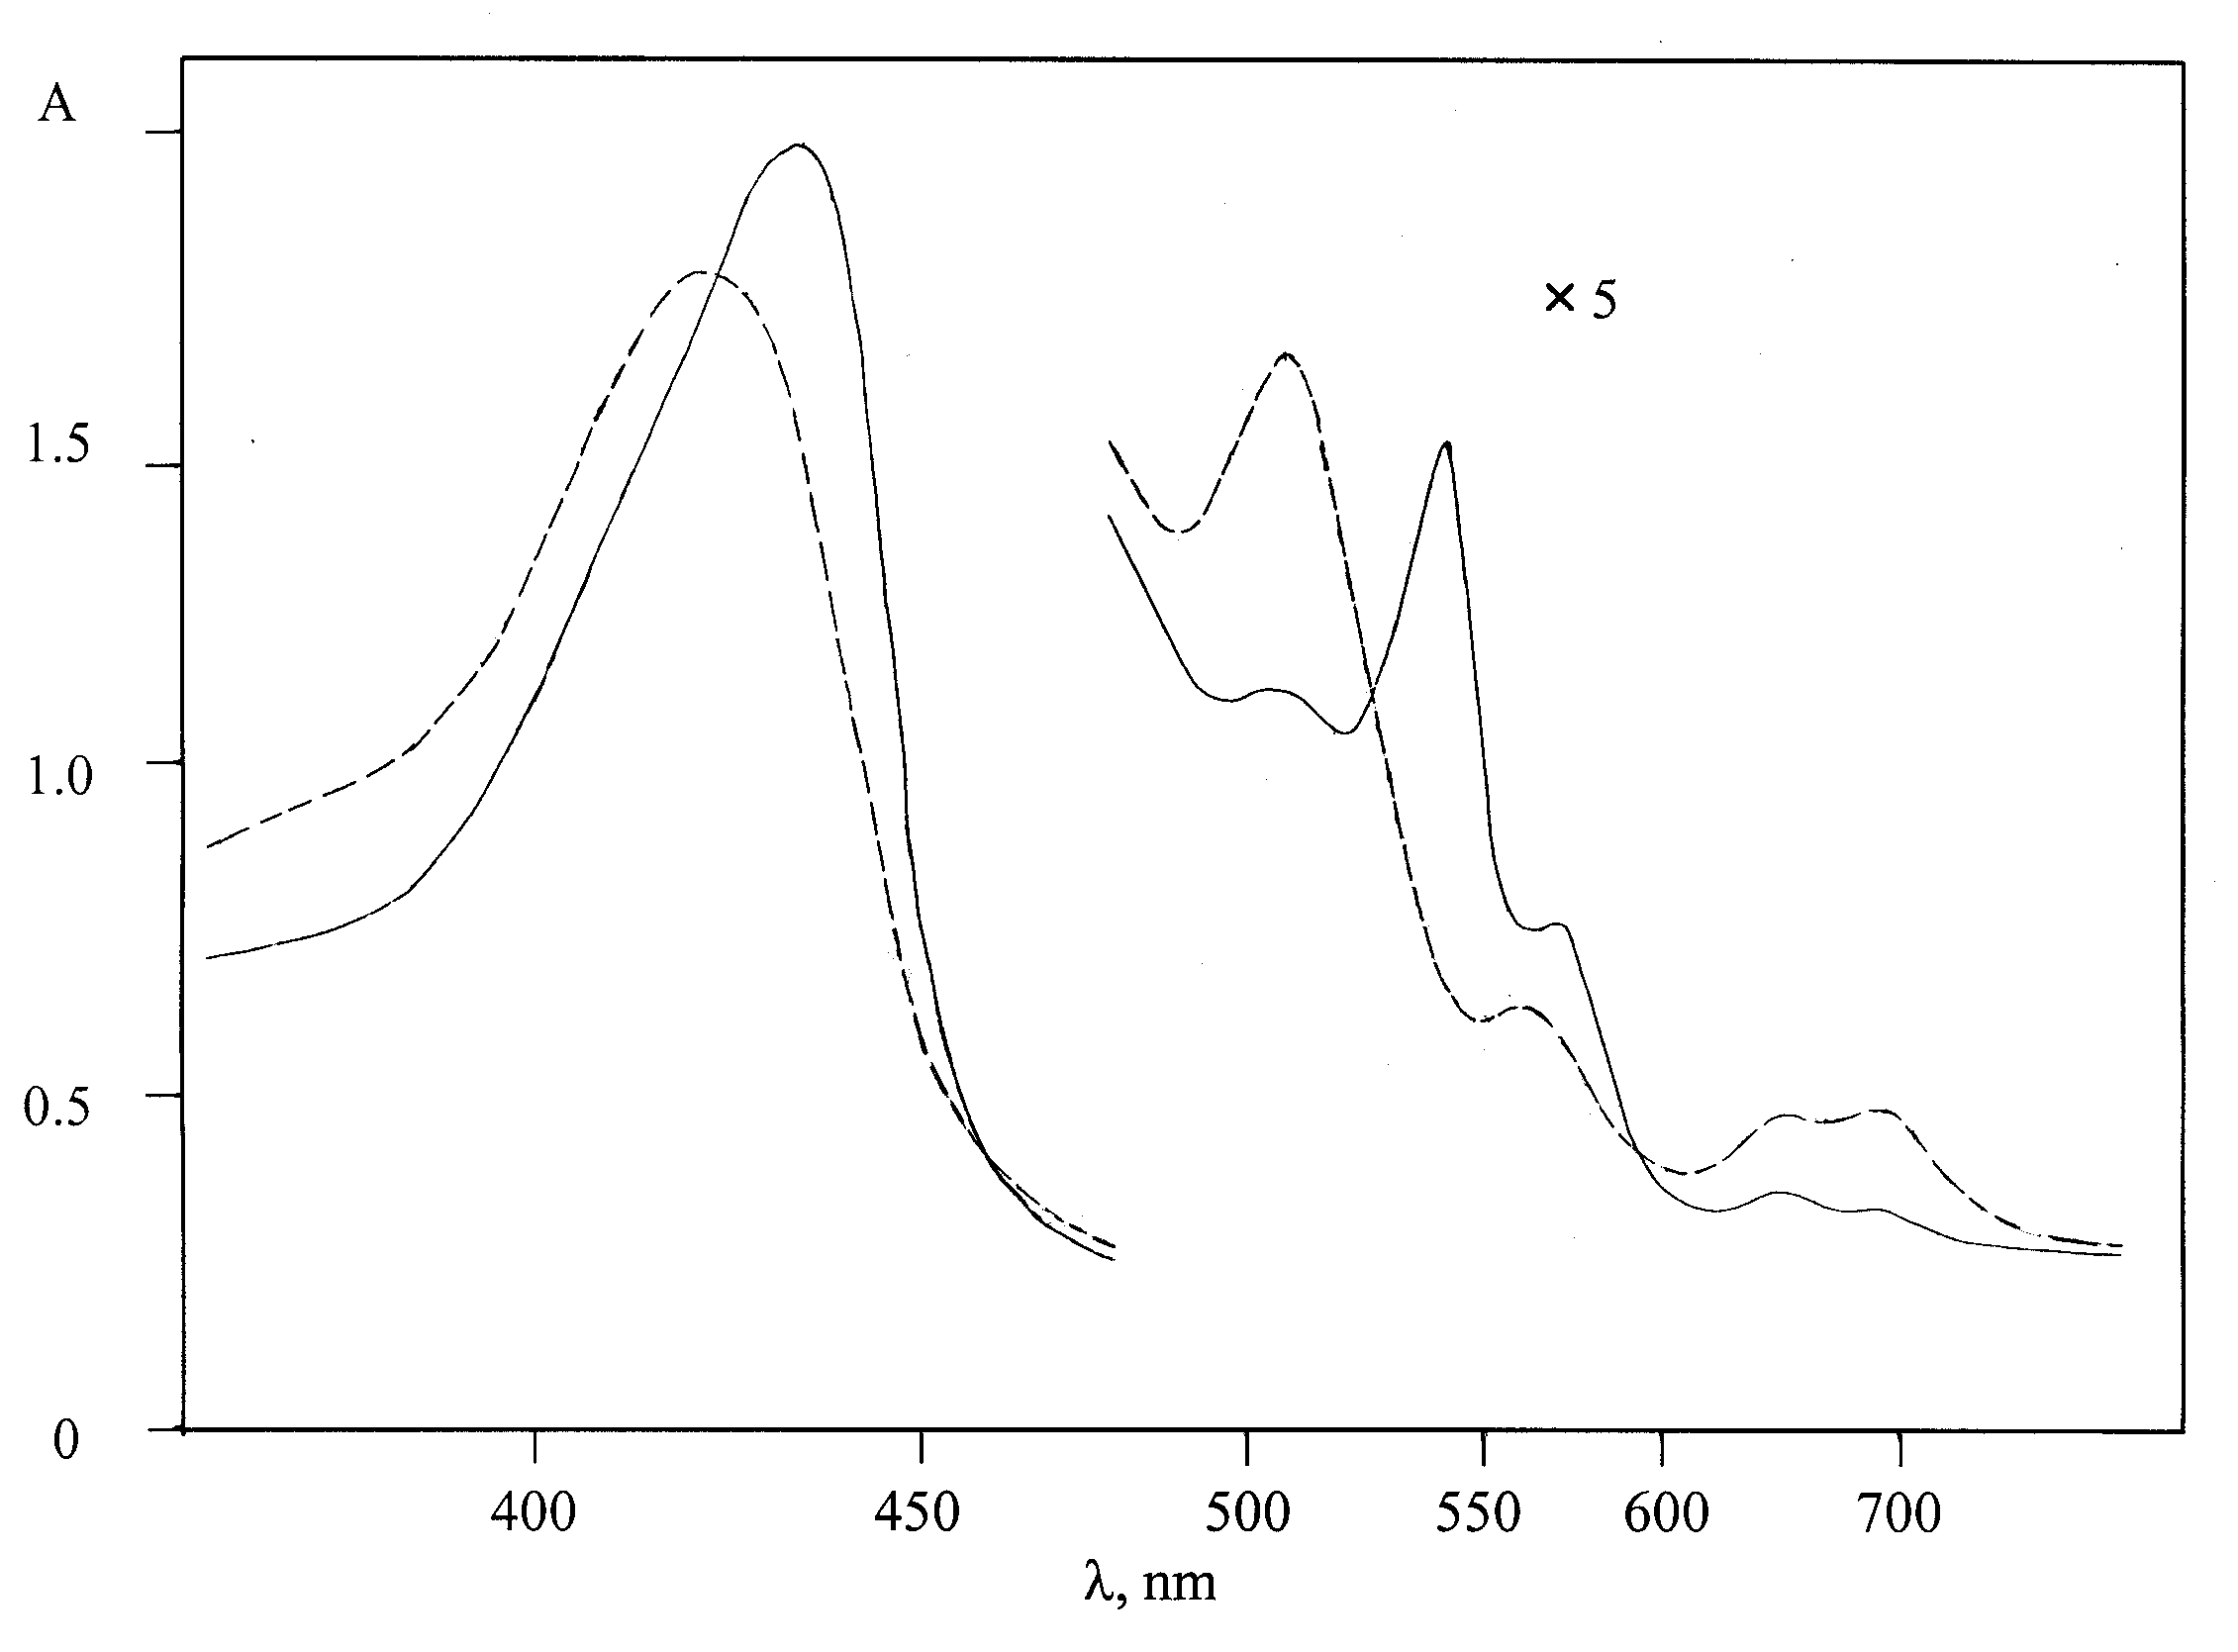
**
